# Supplementary material for: In situ N, O co-doped porous carbon derived from antibiotic fermentation residues as electrode material for high-performance supercapacitors
Source: Royal Society of Chemistry journal article supplement (doi:10.1039/d3ra04164f), 2023-01-01
Supplement: d3ra04164f1.pdf [file d3ra04164f1.pdf]

## Supporting Information

### **In-situ N, O co-doped porous carbon derived from antibiotic fermentation residues as electrode material for high-performance supercapacitor**

Shumeng Qin <sup>1,†</sup>, Peiliang Liu <sup>1,†</sup>, Jieni Wang<sup>2,1,†</sup>, Chenxiao Liu<sup>2,1</sup>, Qizhao Wang<sup>1</sup>, Xuanyu Chen<sup>1</sup>, Shuqin Zhang<sup>2,1</sup>, Yijun Tian<sup>2,1</sup>, Fangfang Zhang<sup>2,1</sup>, Lin Wang<sup>1</sup>, Zhangdong Wei<sup>1</sup>,  
Leichang Cao<sup>2,1\*</sup>, Jinglai Zhang<sup>2</sup>, Shicheng Zhang<sup>3</sup>

<sup>1</sup> Miami College, Henan University, Kaifeng 475004, China

<sup>2</sup> College of Chemistry and Molecular Sciences, Henan University, Kaifeng 475004, China

<sup>3</sup> Shanghai Key Laboratory of Atmospheric Particle Pollution and Prevention (LAP3),  
Department of Environmental Science and Engineering, Fudan University, Shanghai,  
200433, China

\* Corresponding Author: clch666@henu.edu.cn

† These authors contributed equally to this work.

**Number of Pages: 6**

**Number of Figures: 3**

**Number of Tables: 2**

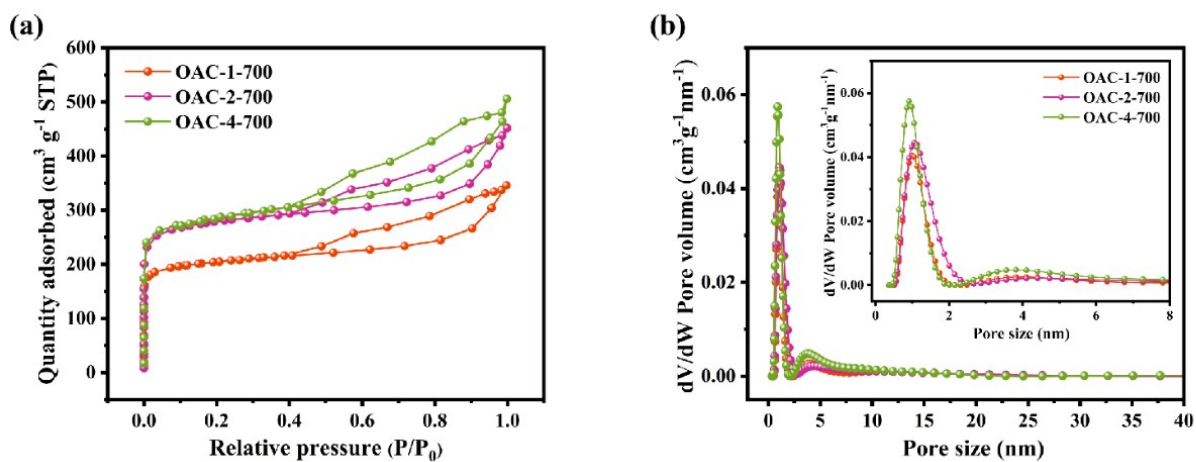

**Fig. S1.** (a) N<sub>2</sub> adsorption-desorption isotherms and (b) pore size distribution of OAC-1-700, OAC-2-700 and OAC-4-700.

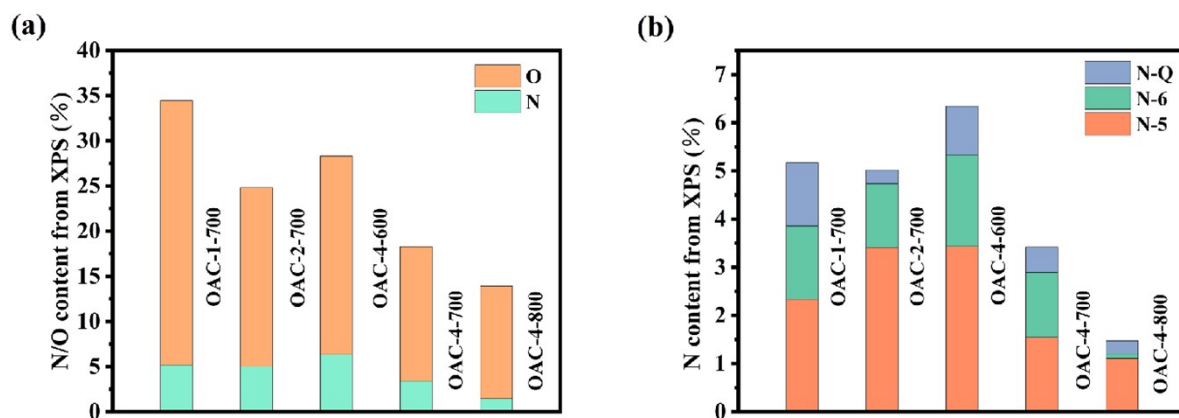

**Fig. S2.** (a) surface N/O elemental contents and (b) the ratios of different N species determined from the high-resolution XPS N 1s spectra of the different samples.

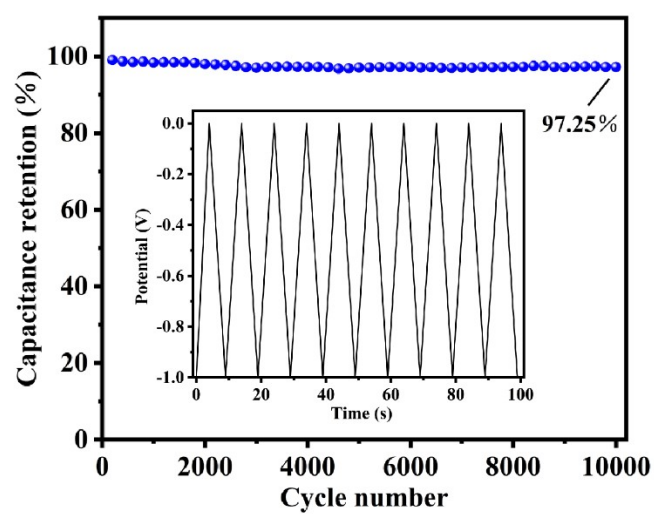

**Fig. S3.** The cycle stability of OAC-4-700 based symmetric supercapacitor measures at 10 A g<sup>-1</sup> current density (the inner picture are the results of the first 10 cycles).

**Table S1.** Elemental analysis of different samples.

| Sample    | Yield% <sup>a</sup> | C (wt.%) | H (wt.%) | O (wt.%) <sup>b</sup> | N (wt.%) |
|-----------|---------------------|----------|----------|-----------------------|----------|
| OFR       | -                   | 46.37    | 5.41     | 39.77                 | 8.45     |
| OPC-600   | 52.4                | 61.59    | 2.32     | 29.33                 | 6.76     |
| OAC-4-600 | 51.6                | 69.59    | 2.11     | 21.96                 | 6.34     |
| OAC-1-700 | 52.1                | 63.42    | 2.13     | 29.28                 | 5.17     |
| OAC-2-700 | 44.5                | 72.87    | 2.31     | 19.80                 | 5.02     |
| OAC-4-700 | 46.7                | 79.47    | 2.25     | 14.86                 | 3.42     |
| OAC-4-800 | 45.2                | 84.83    | 1.23     | 12.47                 | 1.47     |

<sup>a</sup> The yield is determined on a dry basis.

<sup>b</sup> The oxygen content is obtained by subtraction.

**Table S2.**  $R_s$  and  $R_{ct}$  of different samples.

| Sample    | $R_s$ | $R_{ct}$ |
|-----------|-------|----------|
| OAC-4-600 | 0.714 | 0.365    |
| OAC-1-700 | 0.662 | 0.159    |
| OAC-2-700 | 0.690 | 0.099    |
| OAC-4-700 | 0.643 | 0.092    |
| OAC-4-800 | 0.853 | 0.094    |
